# Supplementary material
Source: Springer Nature journal article supplement (https://www.springermedizin.de/resource/supplementary/13256_2014_2946_MOESM5_ESM.pdf/9650896)

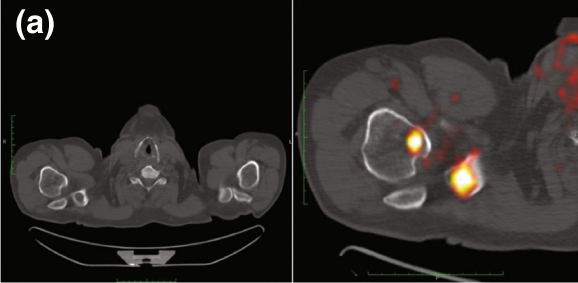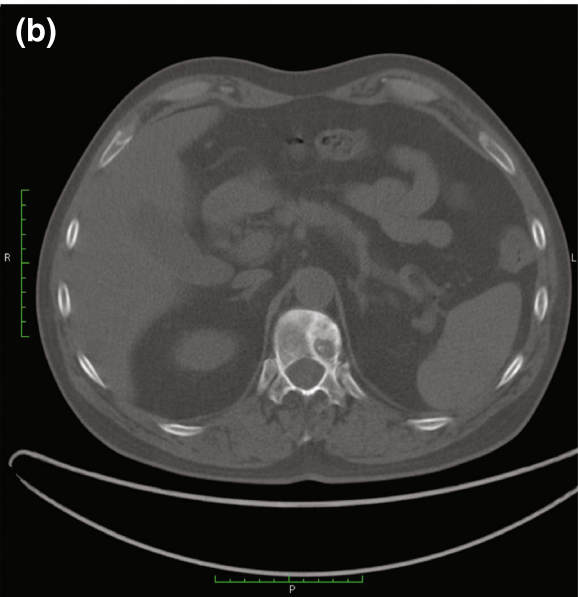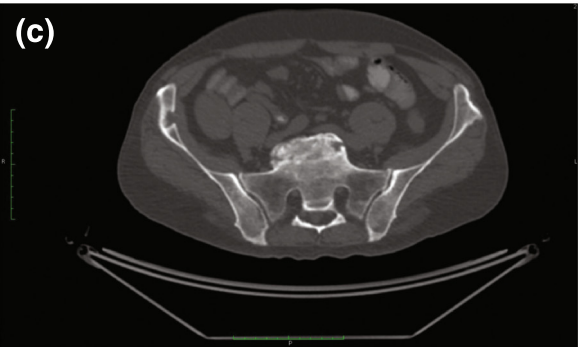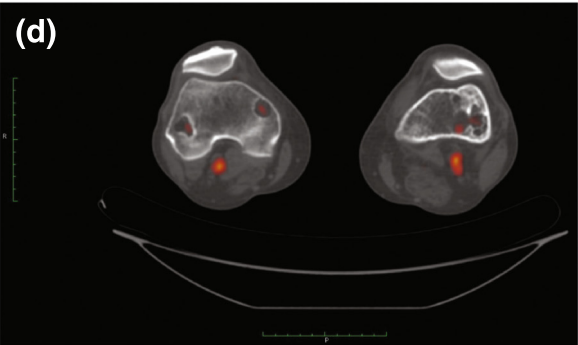

Supplement: MOESM5 [file 9650896]
